# Supplementary material for: Anti-swelling and photoresponsive MXene-based polyampholyte hydrogel sensors for underwater positioning and urban waterlogging pre-warning
Source: Royal Society of Chemistry journal article supplement (doi:10.1039/d4ta03778b), 2024-01-01
Supplement: d4ta03778b4.pdf [file d4ta03778b4.pdf]

## Supporting information

### Anti-swelling and Photo-responsive MXene-based Polyampholyte Hydrogel Sensors for Underwater Positioning and Urban Waterlogging Pre-warning

Yuanna Sun<sup>#a</sup>, Ying Du<sup>#a</sup>, Yu Zhang<sup>a</sup>, Jie Yang<sup>a</sup>, Jiahao Liu<sup>a</sup>, Ruobing Tian<sup>a</sup>, Junbo Wang<sup>a</sup>,  
Qingshan Li<sup>\*a</sup>, Xinhai He<sup>\*a</sup>, Jun Fu<sup>\*b</sup>

<sup>a</sup> School of Materials Science and Engineering, Xi'an Polytechnic University, No.19 Jinhua South Road, Xi'an, 710048, China.

E-mail: [liqingshan-fc@outlook.com](mailto:liqingshan-fc@outlook.com), [hexinhai@xpu.edu.cn](mailto:hexinhai@xpu.edu.cn)

<sup>b</sup> School of Materials Science and Engineering, Sun Yat-sen University, No. 135, Xingang Xi Road, Guangzhou, 510275, China.

E-mail: [fujun8@mail.sysu.edu.cn](mailto:fujun8@mail.sysu.edu.cn)

<sup>#</sup>These authors contributed equally to this work.

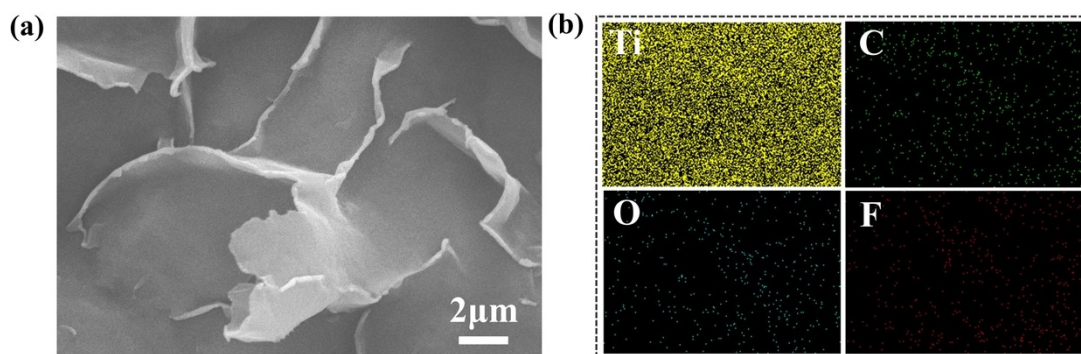

Figure S1 (a) The SEM image and (b) the corresponding element distribution of MXene nanosheets.

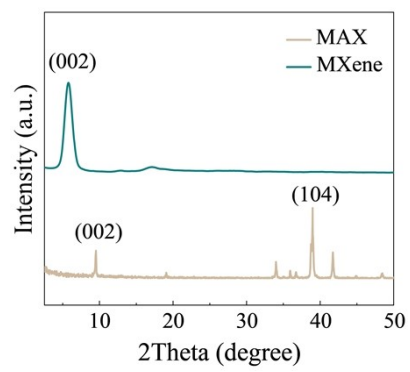

Figure S2 The XRD of MAX and MXene nanosheets.

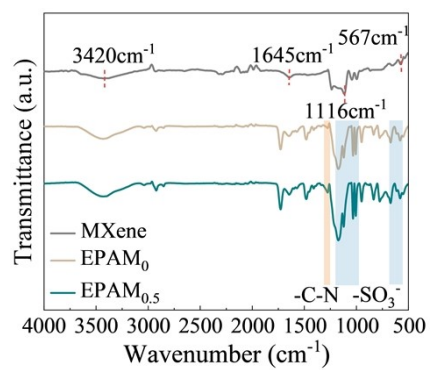

Figure S3 The FTIR of MXene nanosheets, EPAM<sub>0</sub> and EPAM<sub>0.5</sub> hydrogels.

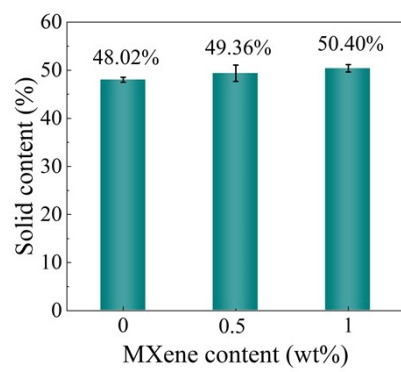

Figure S4 The solid contents of the EPAM<sub>x</sub> hydrogels.

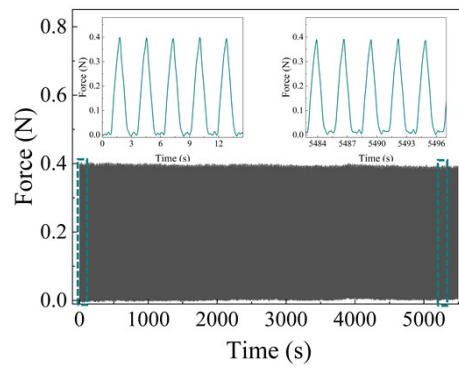

Figure S5. The cyclic tensile tests of the hydrogel for 2000 cycles at 50% strain underwater.

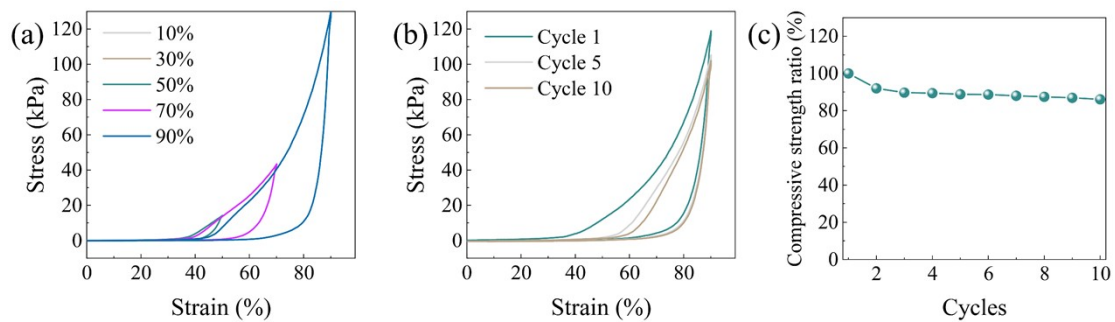

Figure S6. (a) Continuous loading-unloading tests with compressive strain ranging from 10% to 90%. (b) Cyclic compressive loading-unloading tests of the hydrogels under a compression of 90%. (c) Peak force change rate after ten cycles of compression.

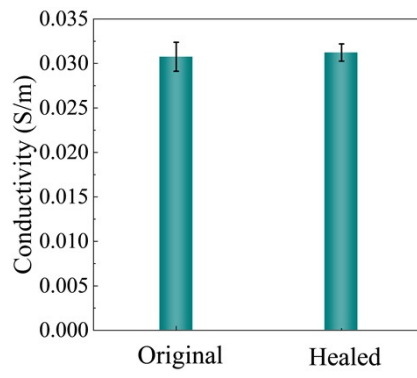

Figure S7. The conductivity of the original and healed hydrogels.

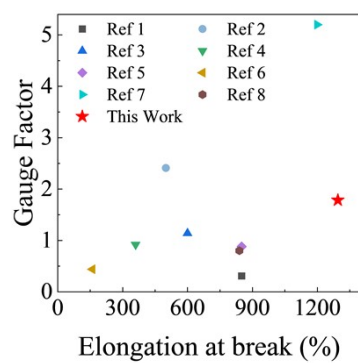

Figure S8. The sensing performance of the EPAM hydrogel sensor compared to other reported anti-swelling hydrogel sensors.



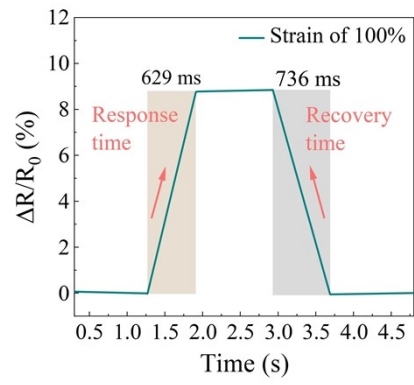

Figure S9 The response and recovery time of the EPAM<sub>0.5</sub> hydrogel-based sensor of 100% strain underwater.

**Table S1.** The composition of EPAM<sub>x</sub> hydrogels.

| 5mL                 | NaSS<br>(g) | DMAEA-Q<br>(g) | MXene<br>(mL) | MBAA<br>(mg) | V50<br>(mg) | H <sub>2</sub> O<br>(mL) |
|---------------------|-------------|----------------|---------------|--------------|-------------|--------------------------|
| EPAM <sub>0</sub>   | 1.15        | 1.42           | 0             | 1.8          | 6.2         | 4.71                     |
| EPAM <sub>0.5</sub> | 1.15        | 1.42           | 0.75          | 1.8          | 6.2         | 3.9                      |
| EPAM <sub>1</sub>   | 1.15        | 1.42           | 1.5           | 1.8          | 6.2         | 3.21                     |

**Table S2.** The relative resistance changes of hydrogel-based sensor under water pressure.

| Water pressure<br>(kPa) | Resistance change ratio<br>(%) |
|-------------------------|--------------------------------|
| 0                       | 0                              |
| 0.98                    | -61.67                         |
| 2.94                    | -93.61                         |
| 4.9                     | -94.65                         |
| 6.86                    | -95.00                         |
| 8.82                    | -95.21                         |
| 10.78                   | -95.31                         |
| 12.74                   | -95.49                         |

## References

1. Bian, Z., Li, Y., Sun, H., Shi, M., Zheng, Y., Liu, H., Liu, C. and Shen, C. Transparent, intrinsically stretchable cellulose nanofiber-mediated conductive hydrogel for strain and humidity sensing. *Carbohydrate Polymers*, **2023**, 301, 120300.
2. Ji, Z., Gong, D., Zhu, M., Yang, J., Bao, Y., Wang, Z. and Xu, M. Mussel-inspired adhesive and anti-swelling hydrogels for underwater strain sensing. *Soft Matter*, **2024**, 20(3), 629-639.
3. Ni, Y., Zang, X., Chen, J., Zhu, T., Yang, Y., Huang, J., Cai, W. and Lai, Y. Flexible MXene-based hydrogel enables wearable human-computer interaction for intelligent underwater communication and sensing rescue. *Advanced Functional Materials*, **2023**, 33(49), 2301127.
4. Zhang, Y., Xu, Z., Yuan, Y., Liu, C., Zhang, M., Zhang, L. and Wan, P. Flexible Antiswelling Photothermal-Therapy MXene Hydrogel-Based Epidermal Sensor for Intelligent Human–Machine Interfacing. *Advanced Functional Materials*, **2023**, 33(21), 2300299.
5. Wu, S., Liu, Z., Gong, C., Li, W., Xu, S., Wen, R., Feng, W., Qiu, Z. and Yan, Y. Spider-silk-inspired strong and tough hydrogel fibers with anti-freezing and water retention properties. *Nature Communications*, **2024**, 15(1), 4441.
6. Wang, S., Wang, L., Qu, X., Lei, B., Zhao, Y., Wang, Q., Wang, W., Shao, J. and Dong, X. Ultrasonic-induced synthesis of underwater adhesive and anti-swelling hydrogel for strain sensor. *ACS Applied Materials & Interfaces*, **2022**, 14(44), 50256-50265.
7. Zhao, Z., Qin, X., Cao, L., Li, J. and Wei, Y. Chitosan-enhanced nonswelling hydrogel with stable mechanical properties for long-lasting underwater sensing. *International Journal of Biological Macromolecules*, **2022**, 212, 123-133.
8. Chen, Y., Wu, W., Cao, X. and Li, B. Induction of polymer-grafted cellulose nanocrystals in hydrogel nanocomposites to increase anti-swelling, mechanical properties and conductive self-recovery for underwater strain sensing. *International Journal of Biological Macromolecules*, **2024**, 274, 133410.
